# Supplementary material for: Sex-related differences in the association between waist circumference and bone mineral density in a Korean population
Source: PubMed Central journal article supplement (PMC4193133; doi:10.1186/1471-2474-15-326), 2014-10-02

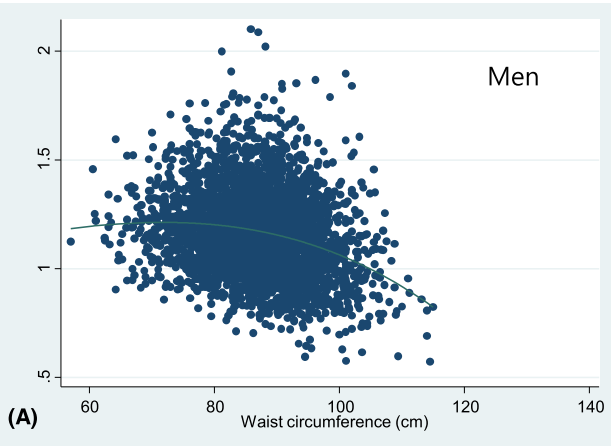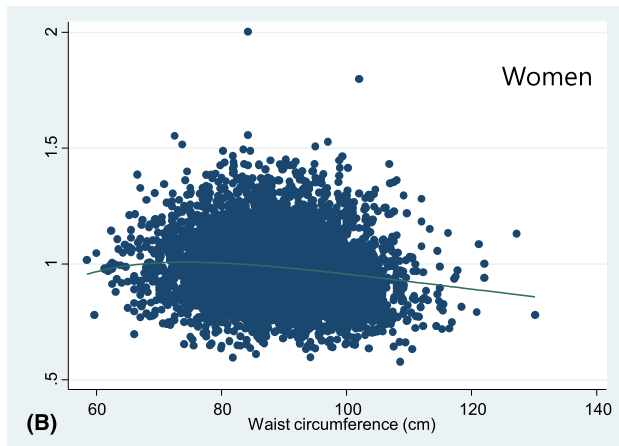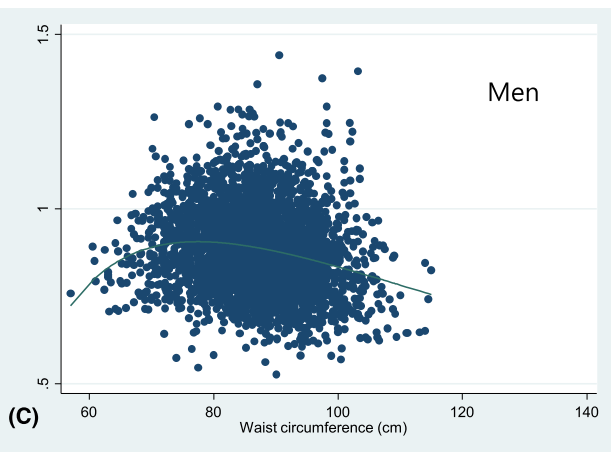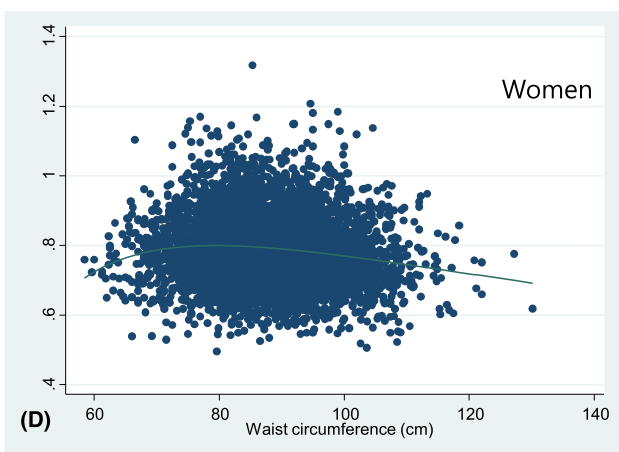

Supplement: 12891_2014_2265_MOESM2_ESM.pdf [file 12891_2014_2265_MOESM2_ESM.pdf]
